# Supplementary material for: Distinct trafficking routes of polarized and non-polarized membrane cargoes in Aspergillus nidulans
Source: eLife journal article supplement (doi:10.7554/elife.103355), 2024-10-21
Supplement: supp [file elife-103355-supp-v1.zip]

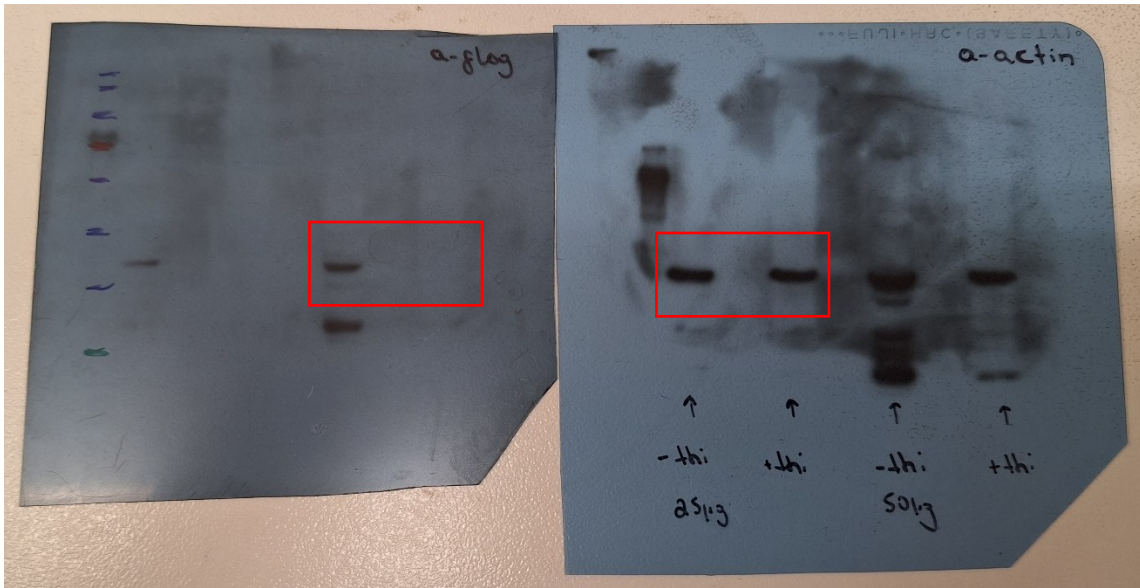

**Figure 8 – Source data 1.** Original X-Ray films corresponding to Figure 8, panel B. Molecular weight marker is shown in the left part. The conditions and the protein concentrations tested for the *thiA<sub>p</sub>-FLAG-sec9* strain are shown in the lower part of the right film.
